# Supplementary material
Source: PubMed Central journal article supplement (PMC3005152)

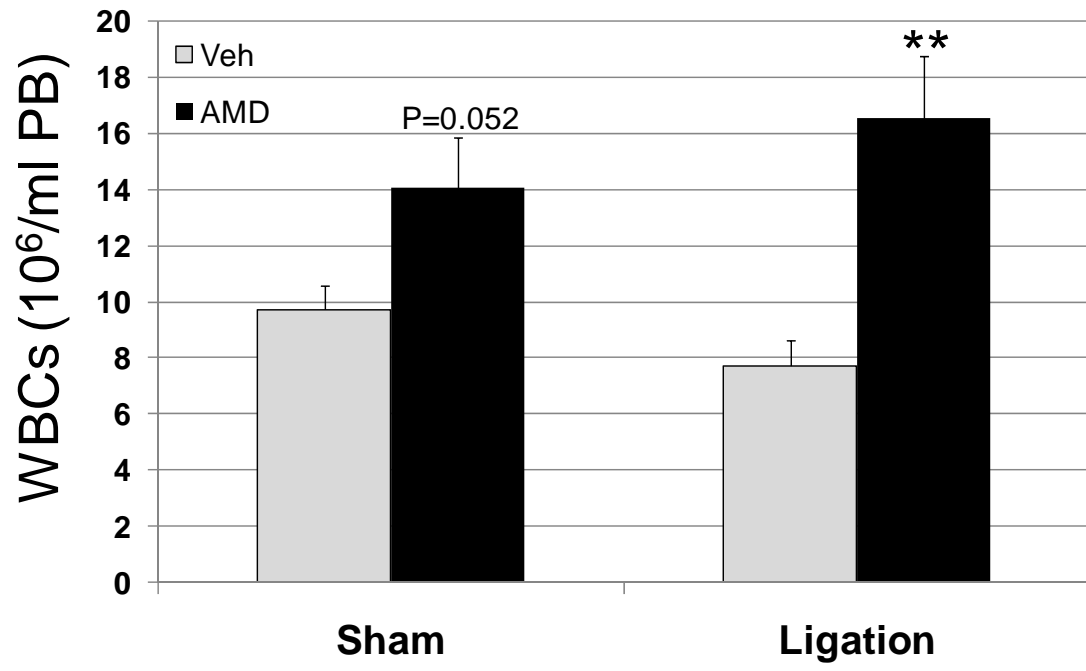

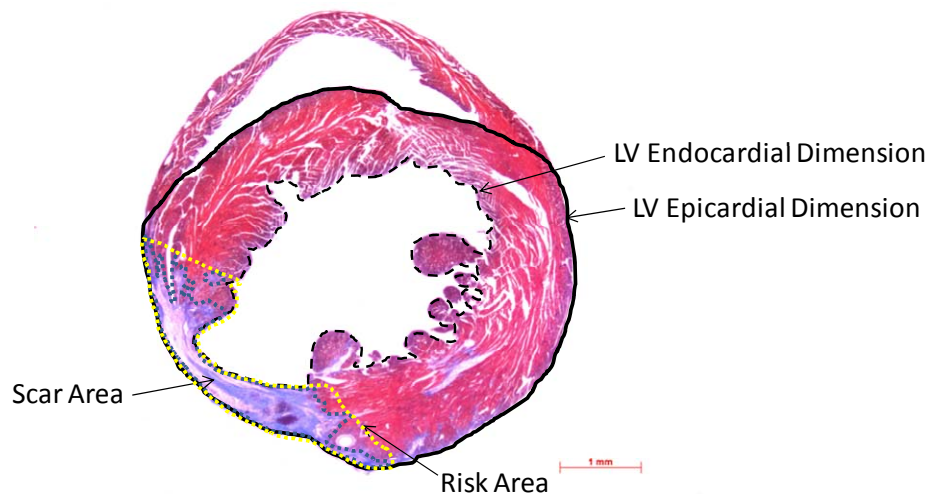

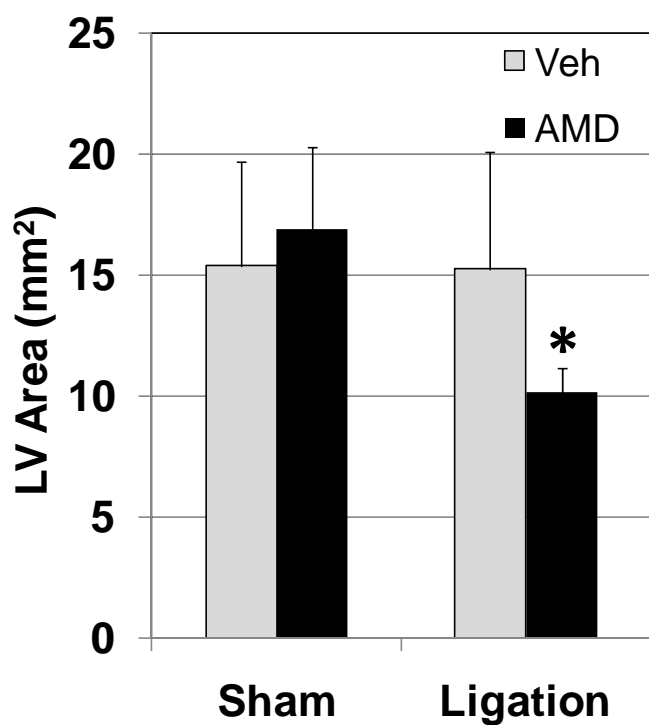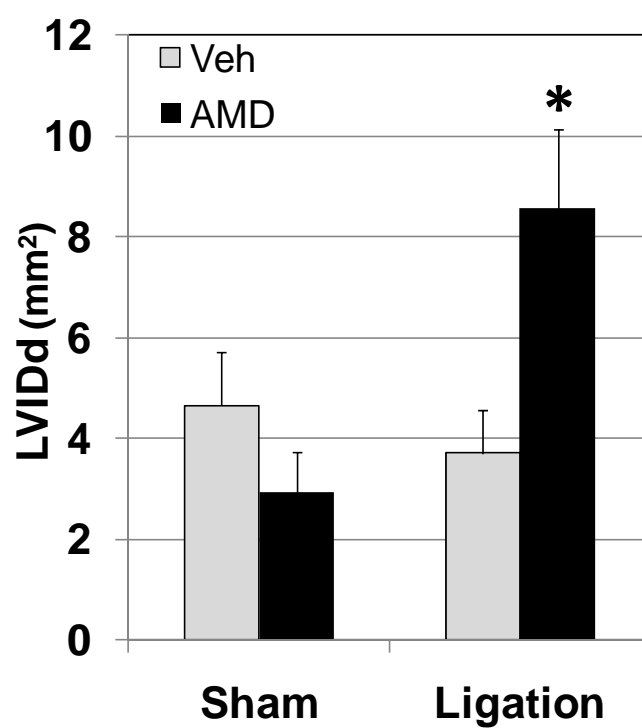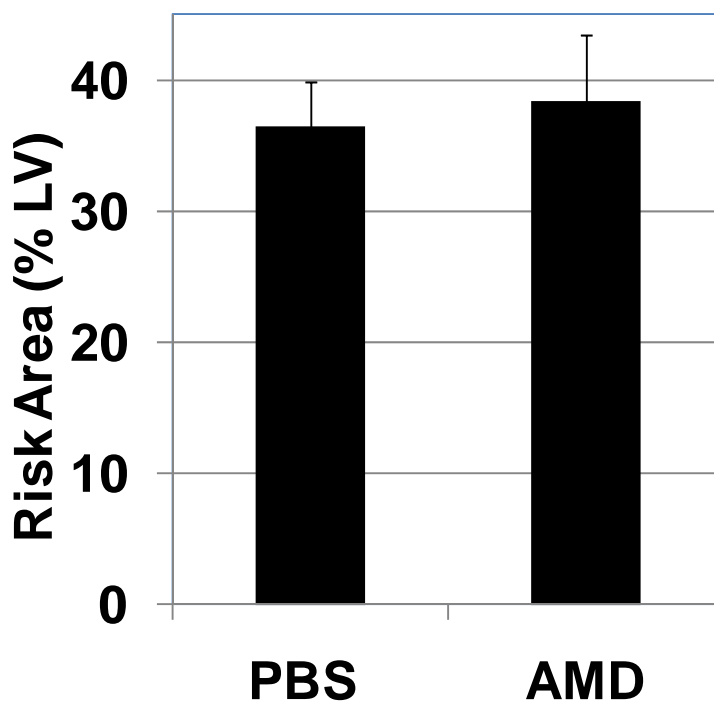

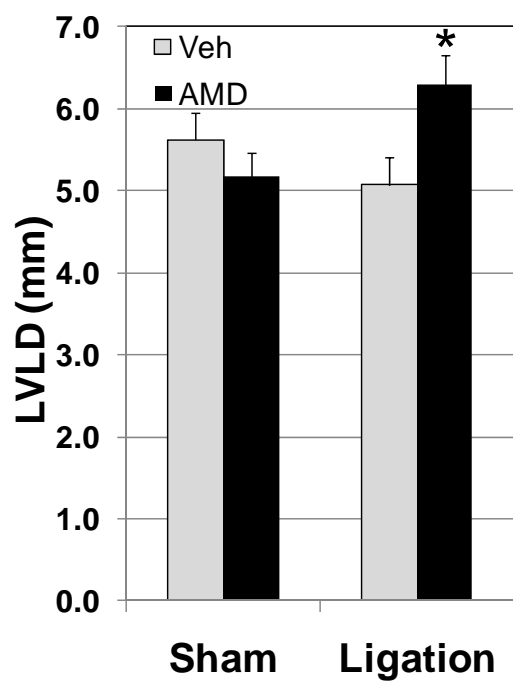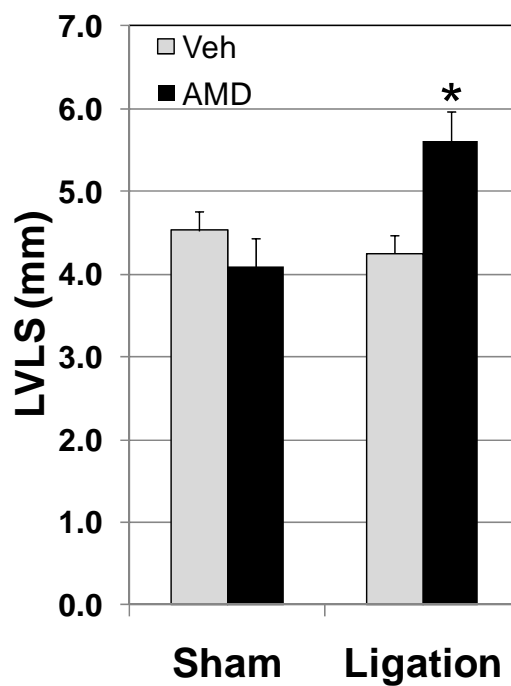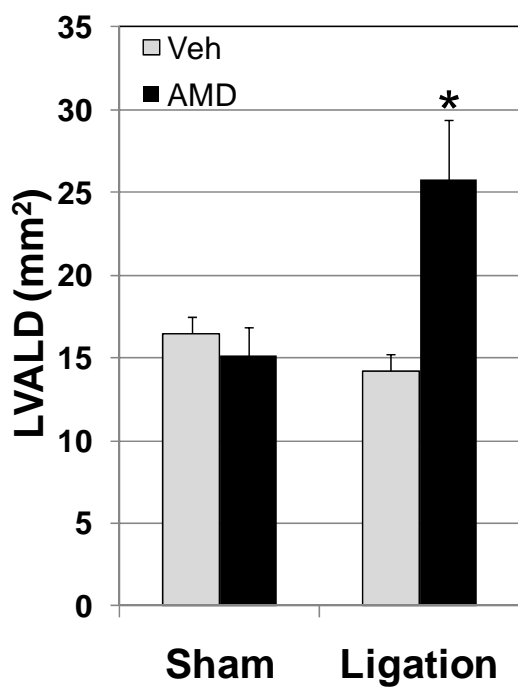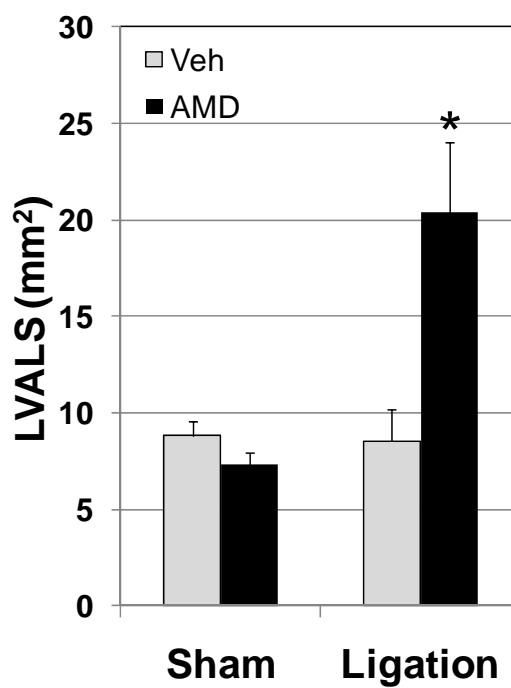

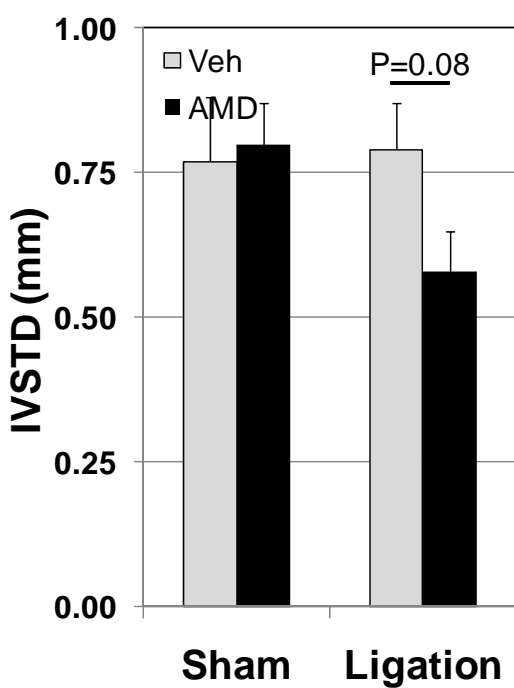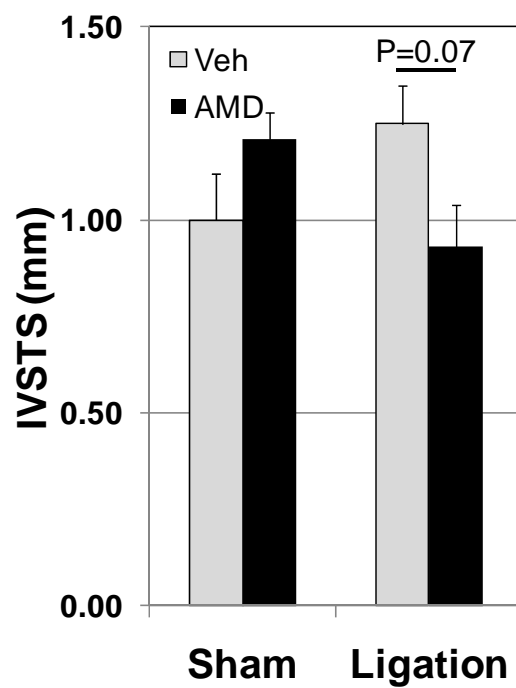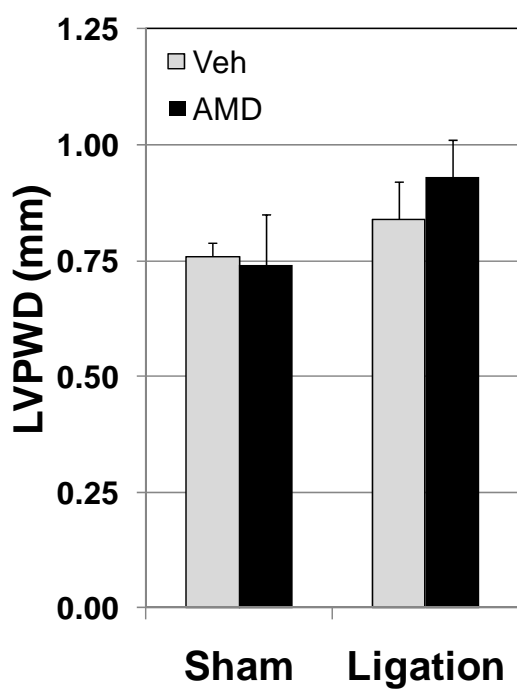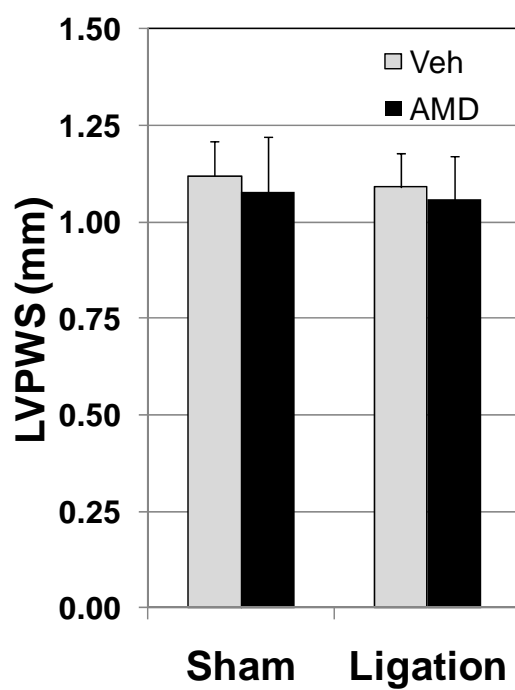

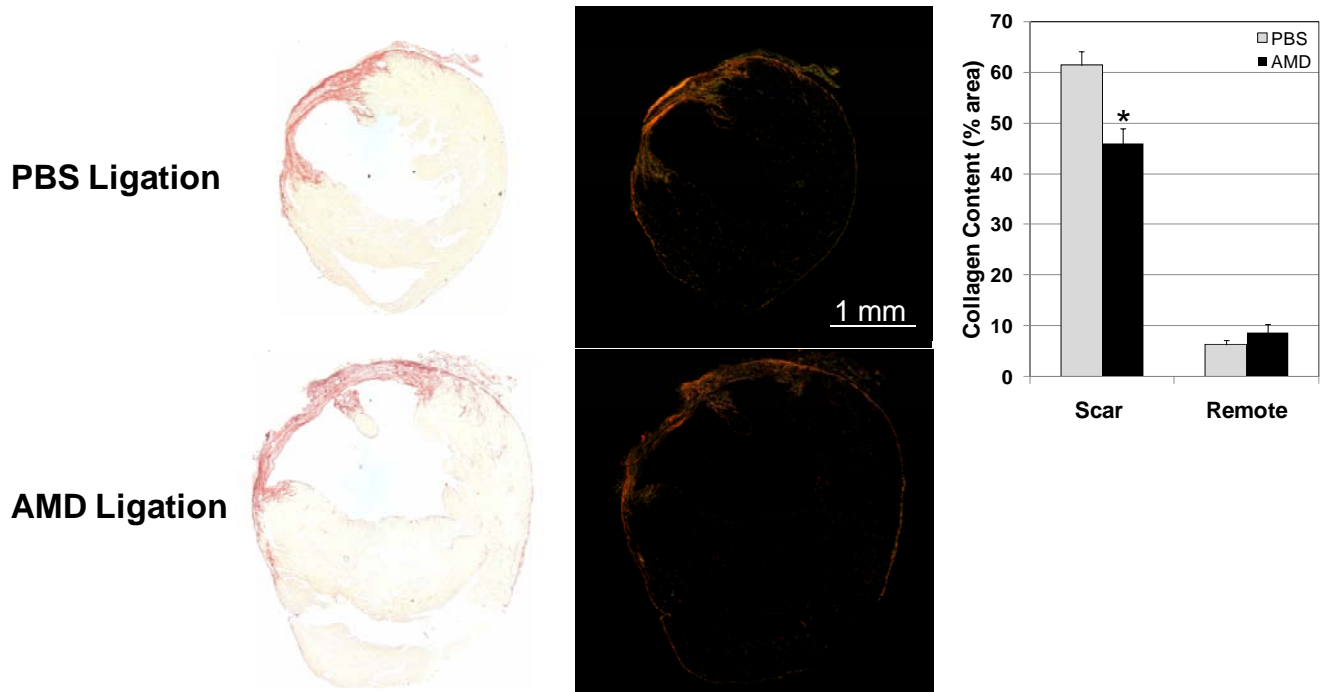

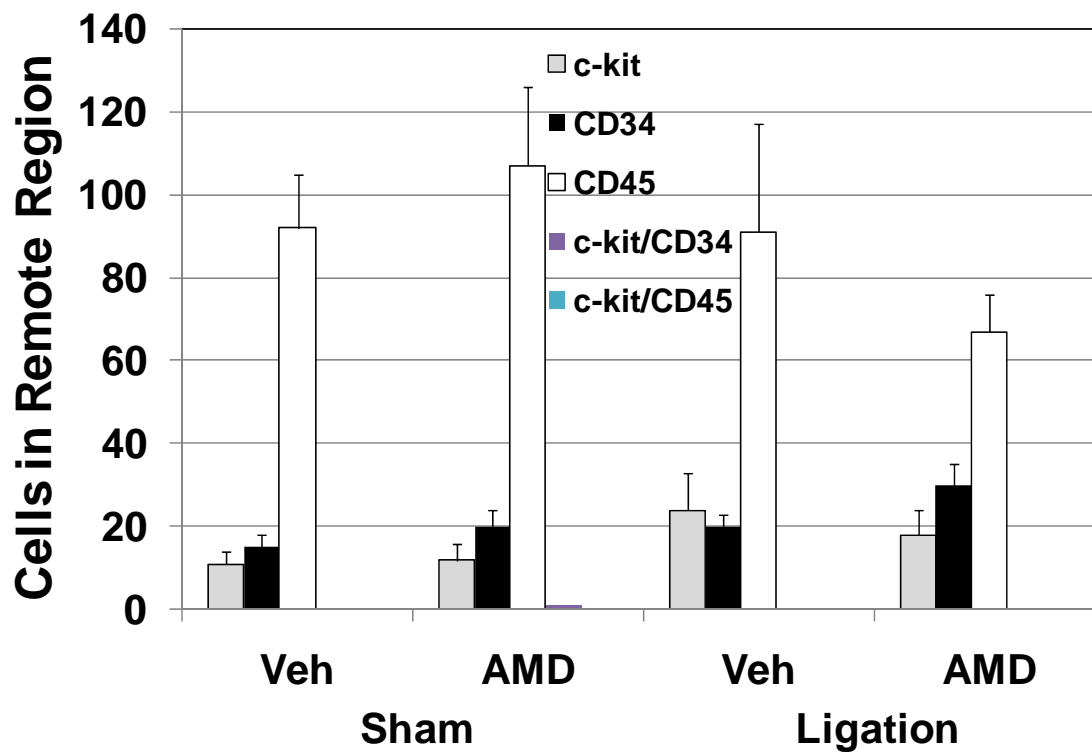

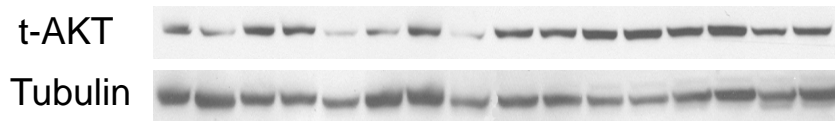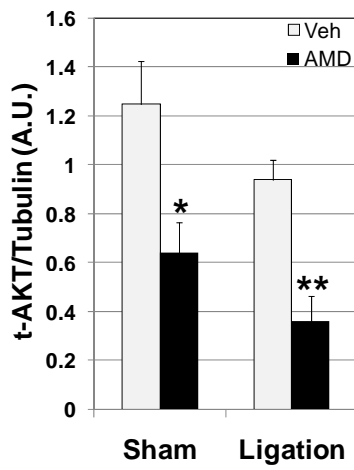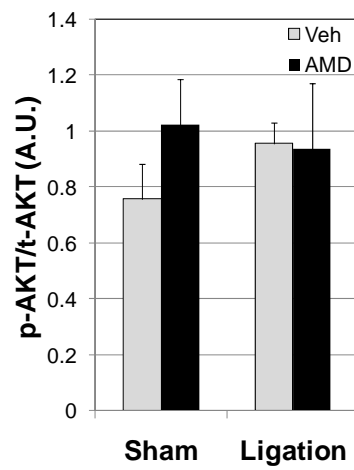



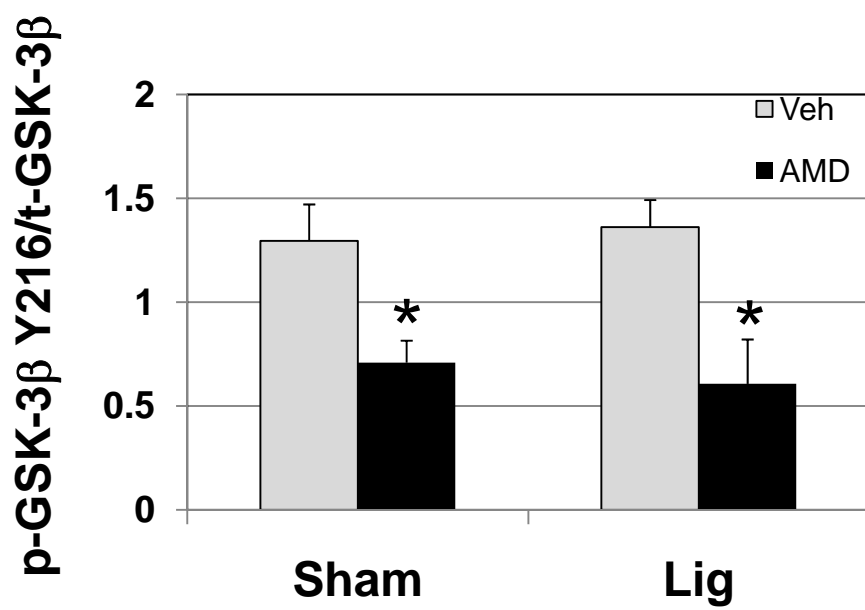

Supplement: NIHMS225655-supplement-Figures.pdf [file NIHMS225655-supplement-Figures.pdf]
